# Supplementary material
Source: PubMed Central journal article supplement (PMC4933254)
Supplement: 10.1074_M116.721746_jbc.M116.721746-12.pdf [file 10.1074_M116.721746_jbc.M116.721746-12.pdf]

# Figure S6

```
SP|P10185|GL_HHV11 -----MGILGWVGLIA-----VGVLCVRGGLPSTEYVIRSRVAREVGDILKVPCV----PLPSDDLDWRYETPSAINY-ALIDGIFLRYHCPGLDTVLWDRHAQKAYW 93
SP|P28278|GL_HHV2H -----MGFVCLFGLVV-----MGAWGAWGGSQATEYVLRSVIAKEVGDILRVPCM----RTPADDVSWRYEAPSVIDY-ARIDGIFLRYHCPGLDTFLWDRHAQRAYL 93
SP|P09308|GL_VZVD -----MASHKWLLQIVFLKTIITAYCLHL-QDDTPLFFGAKPLSDVSLIITEPCV----SSV--YEAWDYAAPPVSNLSEALSGIVVTKCPVPEVILWFKDKQMAYW 96
TR|B9VXR5|B9VXR5_HCMVT MCRRPDCGFSFSPGPVALLWCCILLPIVSSATVSVA-----PTVAEKVPAECPELTR-RCLLGEVFQGDKYESWLRPLVNVTRRDGPLSQL-IRYRPVTPEA----- 95
SP|Q1HVF6|GL_EBVA8 -----MRTVGVFLA-TCL-VTIFVLPTWGNWAYPCCHVTQLRAQHL----- 39
                                     : * : *
SP|P10185|GL_HHV11 VNPFLVAGFLEDLSYPAPPANTQETETRLALYKEIR---QALDSRK---QAASHTPVKAGCVNF-DYSRTRRCVGRQDLGPTNGTSGRTPVLPPDDEAGLQPKPLTTPPPIIATSDP 204
SP|P28278|GL_HHV2H VNPFLFAAGFLEDLSHSVFPADTQETTTRRALYKEIR---DALGSRK---QAVSHAPVRAGCVNF-DYSRTRRCVGRRDLRPANTTSTWEPVSSDDEASSQSKPLATTOPPVLALSNA 204
SP|P09308|GL_VZVD TNPYVTLKGLAQSVGEEHKSGD---IRDALLDALS---GVWVDST---PSSTNIPENGCVWGADRLFQRVCQ----- 193
TR|B9VXR5|B9VXR5_HCMVT ANSVLLDDAFLDTLALLYNNPD---QLRALLTLLSSDTAPRWMTVMRGYSECGDGSPAVYTCVD-----DLCRGYDLTRLSYGRSIFTEHV----LGFELV-----PPSLFNVVV 193
159SP|Q1HVF6|GL_EBVA8 -----LALENISDIYLVSN-----QTCDGFSLASLNSPKNGSNQLVISRCANGLNVV-----SFFISIL 93
                                     . *
SP|P10185|GL_HHV11 TPRRDAATKSRRRR-PH-----SRRL----- 224
SP|P28278|GL_HHV2H PPRRVSPTRGRRRR-TR-----LRRN----- 224
SP|P09308|GL_VZVD ----- 278
TR|B9VXR5|B9VXR5_HCMVT AIRNEATRTNRAVRLPVSTAAAPEGITLFYGLYNAVKEFLCRHQLDPPLLRHLDKYYAGLPPELKQTRVNLPAHSRYGPQAVDAR 278
SP|Q1HVF6|GL_EBVA8 -KRSSSALTG-HLR-----ELLTLETLYGSFSVEDLFGA-----NLNRY-----AWHRGG----- 137
```
