# Supplementary material
Source: PubMed Central journal article supplement (PMC4933254)
Supplement: 10.1074_M116.721746_jbc.M116.721746-13.pdf [file 10.1074_M116.721746_jbc.M116.721746-13.pdf]

# Figure S7

```

SP|O09800|GN_HHV11  -MGPPRRVCRAGLLFVLLVALAAGD---AGPRGEP-PGEEG-G-----RDGIGGARCETQNTGQMSAPGALVPFFYVGMAS----- 69
SP|Q86539|GN_HHV2H  MTGKPARLGRWV--VLLFVA---LV---AGVPGEP-PNAAG-A-----RGVIGDAQCRGDSAGVVSVPGVLVFFYLGMTS----- 65
SP|Q65ZG0|GN_VZVD   -----MG-----2-----1-----SITASFILIT-----MQILF---FC---EDSSGEPNFAERNFWHASCARGVYIDGSMITTLFFY--ASLL 60
TR|B9VXN1|B9VXN1_HCMVT -----MEWNTLVLGLLVLSVAASSNHTSTASTFSPSSSTHTST2YKATTTATTSTTTVTSTTSSTSTKPGSTTHDPNVMRPHAHNDFYKAHCTSHMYELSLSSFAAWWTMLNALL 112
SP|P0C6Z3|GN_EBVA8  -----MGKVLK-----K--PFA-----KAVPLLFIAATWL---LTGVLPA2SSPTNAAAASL2TEAQDQFYSYTCNADITFSPSLTSFAS1IWALLTLVLV 79
      :                                     . * .
SP|O09800|GN_HHV11  MG-VCIIAHVCQICQRLLAAGHA---- 91
SP|Q86539|GN_HHV2H  MG-VCMIAHVYQICQRALAAGSA---- 87
SP|Q65ZG0|GN_VZVD   GVCVALISL1AYHACFRLFTRSVLRSTW 87
TR|B9VXN1|B9VXN1_HCMVT MGAFCIVLR--HCCFQNFATTTKGY- 136
SP|P0C6Z3|GN_EBVA8  IIASATYLM--YVCFNKFVNTLLTD-- 102
      .: * . .:

```
